# Supplementary material
Source: PubMed Central journal article supplement (PMC2658603)
Supplement: NIHMS91557-supplement-1_si_001.pdf [file NIHMS91557-supplement-1_si_001.pdf]

# A Technique to Transfer Metallic Nanoscale Patterns to Small and Non-Planar Surfaces

*Elizabeth J. Smythe<sup>1</sup>, Michael D. Dickey<sup>2</sup>, George M. Whitesides<sup>2\*</sup>, and Federico  
Capasso<sup>1</sup>*

<sup>1</sup> School of Engineering and Applied Sciences, Harvard University, 29 Oxford Street,  
Cambridge, Massachusetts 02138

<sup>2</sup> Department of Chemistry and Chemical Biology, Harvard University, 12 Oxford Street,  
Cambridge, Massachusetts 02138

\*gwhitesides@gmwgroup.harvard.edu

## **Supporting Information**

### *Optional Functionalization of Fiber and Microsphere Substrates*

Substrates were silanized in a 1mM (3-mercaptopropyl)-trimethoxysilane solution in methanol saturated with potassium carbonate, added to accelerate the formation of the SAM on the glass. After 10 minutes, the functionalized substrates were removed from the solution, rinsed in ethanol and dried gently with nitrogen. Figure S.1 shows an

idealized depiction of an optional final substrate silanization that promotes adhesion between the substrate and the transferred metal features.

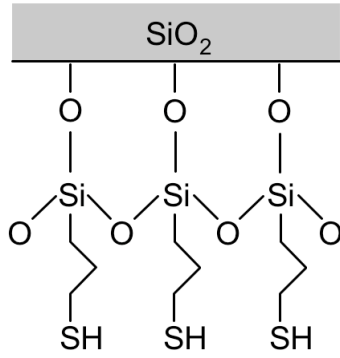

Figure S.1. An idealized representation of an optional final substrate functionalization to assist the transfer of metallic nanostructures.
